# Supplementary material for: Fine-Scale Interactions between Leopard Cats and Their Potential Prey with Contrasting Diel Activities in a Livestock-Dominated Nature Reserve
Source: MDPI journal article supplement (doi:10.3390/ani13081296), 2023-04-10
Supplement: s1 [file s1]

**Table S1.** List of habitat and biotic covariates collected at each camera site for occupancy models in this study

| Covariate (abbreviation)               | Description                                                                             | Data source                                                       |
|----------------------------------------|-----------------------------------------------------------------------------------------|-------------------------------------------------------------------|
| <b>Habitat</b>                         |                                                                                         |                                                                   |
| Distance to settlement<br>(DistSettle) | Distance (m) from each camera to the nearest settlement                                 | Calculated from local geographic information dataset              |
| Distance to road<br>(DistRoad)         | Distance (m) from each camera to the nearest road                                       | Calculated from local geographic information dataset              |
| Distance to water<br>(DistWater)       | Distance (m) from each camera to the nearest supply of water                            | Calculated from local geographic information dataset              |
| Slope (Slo)                            | Angle (°) of inclination to the horizontal within 30 m of each camera site              | Calculated from local geographic information dataset              |
| Aspect (Asp)                           | Shady slopes, semi-shady slopes, semi-sunny slopes, or sunny slopes at each camera site | Calculated from local geographic information dataset              |
| Elevation (Ele)                        | Elevation (m) of the camera sites                                                       | Handheld GPS receivers                                            |
| Enhanced Vegetation Index (EVI)        | Vegetation characteristics around each camera site                                      | Derived from a cloud-free Landsat 8 image                         |
| Forest cover_100m<br>(Forest100)       | Percentage of forest cover around each camera site within a 100 m buffer zone           | Derived from 2010 Global Tree Cover database with 30 m resolution |
| Forest cover_500m<br>(Forest500)       | Percentage of forest cover around each camera site within a 500 m buffer zone           | Derived from 2010 Global Tree Cover database with 30 m resolution |
| Forest cover_1000m<br>(Forest1000)     | Percentage of forest cover around each camera site within a 1000 m buffer zone          | Derived from 2010 Global Tree Cover database with 30 m resolution |
| <b>Biotic</b>                          |                                                                                         |                                                                   |
| Leopard_RAI<br>(LeoRAI)                | RAI (# photo events per 100 day per camera trap) for leopard                            | Calculated from records of camera traps                           |
| Yellow belly skunk_RAI<br>(YbsRAI)     | RAI (# photo events per 100 day per camera trap) for yellow belly skunk                 | Calculated from records of camera traps                           |
| Yellow-throated marten_RAI (YtmRAI)    | RAI (# photo events per 100 day per camera trap) for yellow-throated marten             | Calculated from records of camera traps                           |
| Yellow weasel_RAI<br>(YwRAI)           | RAI (# photo events per 100 day per camera trap) for yellow weasel                      | Calculated from records of camera traps                           |
| Dog_RAI<br>(DogRAI)                    | RAI (# photo events per 100 day per camera trap) for domestic dogs                      | Calculated from records of camera traps                           |

**Table S2.** Pearson's correlation coefficients between covariates at the camera site level.

|            | DistSettle | DistWater | DistRoad | Slo   | Asp   | Ele   | EVI   | Forest100 | Forest500 | Forest1000 | LeoEr | YbsRAI | YtmRAI | YwRAI | DogRAI |
|------------|------------|-----------|----------|-------|-------|-------|-------|-----------|-----------|------------|-------|--------|--------|-------|--------|
| DistSettle | 1.00       |           |          |       |       |       |       |           |           |            |       |        |        |       |        |
| DistWater  | 0.26       | 1.00      |          |       |       |       |       |           |           |            |       |        |        |       |        |
| DistRoad   | 0.36       | 0.03      | 1.00     |       |       |       |       |           |           |            |       |        |        |       |        |
| Slo        | -0.14      | 0.08      | -0.16    | 1.00  |       |       |       |           |           |            |       |        |        |       |        |
| Asp        | -0.01      | 0.19      | -0.09    | -0.06 | 1     |       |       |           |           |            |       |        |        |       |        |
| Ele        | 0.32       | 0.37      | 0.38     | 0.09  | 0.12  | 1.00  |       |           |           |            |       |        |        |       |        |
| EVI        | 0.25       | 0.37      | 0.27     | 0.14  | -0.08 | 0.68  | 1.00  |           |           |            |       |        |        |       |        |
| Forest100  | 0.38       | 0.21      | 0.16     | 0.02  | -0.03 | 0.33  | 0.61  | 1.00      |           |            |       |        |        |       |        |
| Forest500  | 0.55       | 0.29      | 0.27     | 0.01  | 0.15  | 0.53  | 0.57  | 0.73      | 1.00      |            |       |        |        |       |        |
| Forest1000 | 0.51       | 0.39      | 0.27     | 0.05  | 0.17  | 0.68  | 0.62  | 0.56      | 0.89      | 1.00       |       |        |        |       |        |
| LeoEr      | -0.03      | 0.08      | 0.23     | 0.08  | 0.18  | 0.43  | 0.14  | 0.03      | 0.07      | 0.13       | 1.00  |        |        |       |        |
| YbsRAI     | 0.08       | -0.12     | 0.02     | 0     | 0.01  | -0.08 | 0.02  | 0.16      | 0.13      | 0.12       | -0.05 | 1.00   |        |       |        |
| YtmRAI     | -0.12      | -0.23     | -0.14    | -0.09 | -0.16 | -0.14 | -0.33 | -0.36     | -0.31     | -0.29      | -0.05 | 0.01   | 1.00   |       |        |
| YwRAI      | -0.09      | -0.07     | -0.15    | -0.06 | 0.03  | 0.03  | 0.10  | 0.14      | 0.08      | 0.07       | 0.16  | 0.37   | -0.04  | 1.00  |        |
| DogRAI     | 0.06       | 0.15      | -0.13    | -0.07 | -0.01 | 0.03  | 0.08  | 0.18      | -0.02     | 0.02       | 0.07  | -0.13  | -0.03  | -0.08 | 1.00   |

**Table S3.** The single-species detection models for leopard cats, their prey, and livestock. The top best fitting detection model was carried forward for the next occupancy model.

| Species/Model                           | K | AIC    | $\Delta AIC$ | W        |
|-----------------------------------------|---|--------|--------------|----------|
| <b>Leopard cat</b>                      |   |        |              |          |
| p(DistSettle), $\psi(\cdot)$            | 3 | 623.20 | 0            | 0.39     |
| p( $\cdot$ ), $\psi(\cdot)$             | 2 | 623.59 | 0.39         | 0.32     |
| p(DistRoad + DistSettle), $\psi(\cdot)$ | 4 | 624.85 | 1.65         | 0.17     |
| p(DistRoad), $\psi(\cdot)$              | 3 | 625.55 | 2.35         | 0.12     |
| <b>Nocturnal rats</b>                   |   |        |              |          |
| p(DistRoad + DistSettle), $\psi(\cdot)$ | 4 | 337.46 | 0            | 0.97286  |
| p(DistRoad), $\psi(\cdot)$              | 3 | 344.66 | 7.20         | 0.02653  |
| p(DistSettle), $\psi(\cdot)$            | 3 | 353.55 | 16.10        | 0.00031  |
| p( $\cdot$ ), $\psi(\cdot)$             | 2 | 353.62 | 16.16        | 0.0003   |
| <b>Diurnal squirrels</b>                |   |        |              |          |
| p(DistRoad), $\psi(\cdot)$              | 3 | 604.08 | 0            | 0.721    |
| p(DistRoad + DistSettle), $\psi(\cdot)$ | 4 | 606.01 | 1.93         | 0.2754   |
| p(DistSettle), $\psi(\cdot)$            | 3 | 615.62 | 11.54        | 0.0023   |
| p( $\cdot$ ), $\psi(\cdot)$             | 2 | 616.59 | 12.51        | 0.0014   |
| <b>Livestock</b>                        |   |        |              |          |
| p(DistRoad + DistSettle), $\psi(\cdot)$ | 4 | 633.37 | 0            | 8.70e-01 |
| p(DistSettle), $\psi(\cdot)$            | 3 | 637.24 | 3.87         | 1.30e-01 |
| p( $\cdot$ ), $\psi(\cdot)$             | 2 | 653.80 | 20.43        | 3.20e-05 |
| p(DistRoad), $\psi(\cdot)$              | 3 | 655.52 | 22.15        | 1.40e-05 |

**Table S4.** Summary of top eight single-species occupancy models indicating the role of covariates in determining probability of site use ( $\psi$ ) and detection ( $p$ ) of leopard cats, their prey, and livestock.

| Species/Model                                               | K | AIC    | $\Delta$ AIC | W     |
|-------------------------------------------------------------|---|--------|--------------|-------|
| <b>Leopard cat</b>                                          |   |        |              |       |
| p(DistSettle), $\psi$ (DistSettle)                          | 4 | 620.97 | 0            | 0.235 |
| p(DistSettle), $\psi$ (DistWater)                           | 4 | 621.31 | 0.34         | 0.199 |
| p(DistSettle), $\psi$ (DistSettle2)                         | 4 | 621.44 | 0.47         | 0.186 |
| p(DistSettle), $\psi$ (YtmRAI)                              | 4 | 622.30 | 1.33         | 0.121 |
| p(DistSettle), $\psi$ (.)                                   | 3 | 623.20 | 2.23         | 0.077 |
| p(DistSettle), $\psi$ (YbsRAI)                              | 4 | 623.87 | 2.90         | 0.055 |
| p(DistSettle), $\psi$ (Ele)                                 | 4 | 624.76 | 3.79         | 0.035 |
| p(DistSettle), $\psi$ (LeoRAI)                              | 4 | 624.87 | 3.90         | 0.034 |
| <b>Nocturnal rats</b>                                       |   |        |              |       |
| p(DistRoad + DistSettle), $\psi$ (Asp)                      | 5 | 330.73 | 0            | 0.638 |
| p(DistRoad + DistSettle), $\psi$ (EVI)                      | 5 | 335.01 | 4.28         | 0.075 |
| p(DistRoad + DistSettle), $\psi$ (Forest100)                | 5 | 335.58 | 4.85         | 0.056 |
| p(DistRoad + DistSettle), $\psi$ (Ele2)                     | 5 | 336.17 | 5.44         | 0.042 |
| p(DistRoad + DistSettle), $\psi$ (Ele)                      | 5 | 336.29 | 5.56         | 0.040 |
| p(DistRoad + DistSettle), $\psi$ (Forest1000)               | 5 | 336.94 | 6.21         | 0.029 |
| p(DistRoad + DistSettle), $\psi$ (DistRoad)                 | 5 | 337.12 | 6.39         | 0.026 |
| p(DistRoad + DistSettle), $\psi$ (.)                        | 4 | 337.46 | 6.73         | 0.022 |
| <b>Diurnal squirrels</b>                                    |   |        |              |       |
| p(DistRoad), $\psi$ (Forest100)                             | 4 | 604.08 | 0            | 0.120 |
| p(DistRoad), $\psi$ (.)                                     | 3 | 604.08 | 0.01         | 0.120 |
| p(DistRoad), $\psi$ (Asp)                                   | 4 | 604.75 | 0.67         | 0.086 |
| p(DistRoad), $\psi$ (Slo)                                   | 4 | 604.76 | 0.68         | 0.085 |
| p(DistRoad), $\psi$ (Ele)                                   | 4 | 605.17 | 1.09         | 0.070 |
| p(DistRoad), $\psi$ (Forest1000)                            | 4 | 605.23 | 1.14         | 0.068 |
| p(DistRoad), $\psi$ (Forest500)                             | 4 | 605.23 | 1.14         | 0.068 |
| p(DistRoad), $\psi$ (Ele <sup>2</sup> )                     | 4 | 605.54 | 1.46         | 0.058 |
| <b>Livestock</b>                                            |   |        |              |       |
| p(DistRoad + DistSettle), $\psi$ (.)                        | 4 | 633.37 | 0            | 0.123 |
| p(DistRoad + DistSettle), $\psi$ (DistSettle <sup>2</sup> ) | 5 | 633.44 | 0.07         | 0.119 |
| p(DistRoad + DistSettle), $\psi$ (Asp)                      | 5 | 633.87 | 0.50         | 0.096 |
| p(DistRoad + DistSettle), $\psi$ (Forest1000)               | 5 | 634.00 | 0.63         | 0.090 |
| p(DistRoad + DistSettle), $\psi$ (DistSettle)               | 5 | 634.50 | 1.13         | 0.070 |
| p(DistRoad + DistSettle), $\psi$ (Slo)                      | 5 | 634.61 | 1.24         | 0.066 |
| p(DistRoad + DistSettle), $\psi$ (DistWater)                | 5 | 634.99 | 1.62         | 0.055 |
| p(DistRoad + DistSettle), $\psi$ (DistRoad)                 | 5 | 635.04 | 1.67         | 0.053 |

**Table S5.** Regression coefficients from the SEM model for leopard cat, their potential prey and livestock in higher grazing sites. The  $\chi^2$  test statistic was used, with 1 degree of freedom, and *P* value was 0.590, which indicated moderate to good fit.

| <b>Regressions (direct effect):</b>                           |   |                   | Estimate | SE    | Z-Score | <i>P</i> value |
|---------------------------------------------------------------|---|-------------------|----------|-------|---------|----------------|
| Leopard cat                                                   | ~ | Livestock         | 0.124    | 0.146 | 0.849   | 0.396          |
| nocturnal rats                                                | ~ | Livestock         | -0.163   | 0.183 | -0.893  | 0.372          |
| Diurnal squirrels                                             | ~ | Livestock         | -0.079   | 0.188 | -0.420  | 0.675          |
| Leopard cats                                                  | ~ | Nocturnal rats    | 0.632    | 0.117 | 5.423   | 0.000          |
| Leopard cats                                                  | ~ | Diurnal squirrels | 0.148    | 0.145 | 1.024   | 0.306          |
| <b>Defined Parameters (indirect effect):</b>                  |   |                   |          |       |         |                |
| Effect of Livestock on Leopard cats through diurnal squirrels |   |                   | -0.010   | 0.026 | -0.376  | 0.707          |
| Effect of Livestock on Leopard cats through nocturnal rats    |   |                   | -0.020   | 0.033 | -0.613  | 0.540          |
| Total effect of Livestock on Leopard cats                     |   |                   | 0.094    | 0.115 | 0.815   | 0.415          |

**Table S6.** Regression coefficients from the SEM model for leopard cats, their potential prey and livestock in lower grazing sites. The  $\chi^2$  test statistic was used, with 1 degree of freedom, and  $P$  value was 0.674, which indicated moderate to good fit.

| <b>Regressions (direct effect):</b>                           |   |                   | Estimate | SE    | Z-Score | $P$ value |
|---------------------------------------------------------------|---|-------------------|----------|-------|---------|-----------|
| Leopard cats                                                  | ~ | Livestock         | -0.080   | 0.165 | -0.484  | 0.629     |
| Nocturnal rats                                                | ~ | Livestock         | 0.119    | 0.186 | 0.643   | 0.520     |
| Diurnal squirrels                                             | ~ | Livestock         | 0.385    | 0.155 | 2.484   | 0.013     |
| Leopard cats                                                  | ~ | Nocturnal rats    | 0.526    | 0.133 | 3.944   | 0.000     |
| Leopard cats                                                  | ~ | Diurnal squirrels | -0.280   | 0.161 | -1.742  | 0.082     |
| <b>Defined Parameters (indirect effect):</b>                  |   |                   |          |       |         |           |
| Effect of Livestock on Leopard cats through diurnal squirrels |   |                   | -0.031   | 0.065 | -0.475  | 0.635     |
| Effect of Livestock on Leopard cats through nocturnal rats    |   |                   | -0.010   | 0.025 | -0.385  | 0.700     |
| Total effect of Livestock on Leopard cats                     |   |                   | -0.120   | 0.249 | -0.482  | 0.630     |

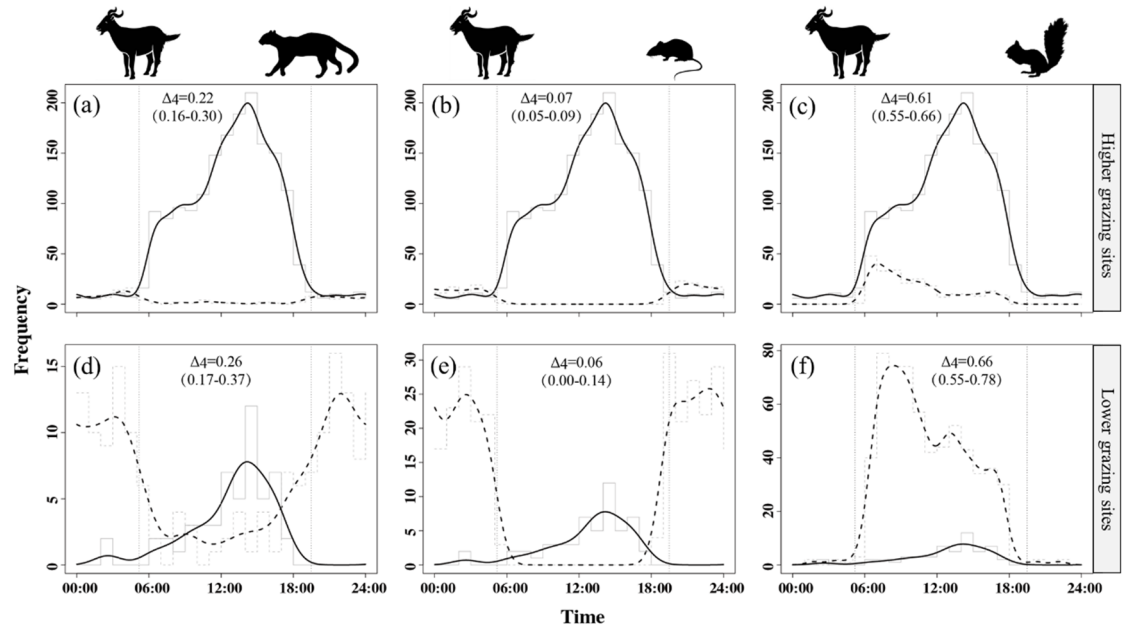

**Figure S1.** Pairwise comparisons of daily activity patterns between the livestock (solid line) and leopard cats as well as their potential prey (broken lines) in higher and lower grazing sites. Overlap coefficients ( $\Delta$ ), their respective 95% confident intervals are shown at the top of each graph. The vertical black dashed lines in x-axis represent the sunrise the sunset.

**Table S7.** Proportion of detections in each period of leopard cats and diurnal squirrels in higher and lower grazing sites.

| Species              | Dawn    | Day     | Dusk   | Night   |
|----------------------|---------|---------|--------|---------|
| Leopard cats         |         |         |        |         |
| Higher grazing sites | 12.15 % | 13.08 % | 8.41 % | 66.36 % |
| Lower grazing sites  | 10.53 % | 15.79 % | 8.55 % | 65.13 % |
| Diurnal squirrels    |         |         |        |         |
| Higher grazing sites | 3.80%   | 94.09%  | 2.11 % |         |
| Lower grazing sites  | 1.94%   | 95.63%  | 2.43 % |         |
